# Supplementary material for: Pre-organization induced synthesis of a crossed alkene-bridged nisin Z DE-ring mimic by ring-closing metathesis
Source: Royal Society of Chemistry journal article supplement (doi:10.1039/b415555f), 2004-12-02
Supplement: b415555f.doc [file b415555f.doc]

Pre-organization Induced Synthesis of a Crossed alkene-bridged Nisin Z DE-ring Mimic by Ring-Closing Metathesis

by:

Nourdin Ghalit, Dirk T.S. Rijkers, Johan Kemmink, Cees Versluis, and Rob M.J. Liskamp*

**Supporting information.**

**General.** Unless stated otherwise chemicals were obtained from commercial sources and used without further purification. DIPEA was distilled consecutively from ninhydrin and KOH. Dry solvents were obtained as peptide grade solvents from Biosolve (Valkenswaard, The Netherlands) and stored over molecular sieves (4Å). NMR spectra were recorded on a Varian Gemini-300 (300 MHz) or on an INOVA-500 (500 MHz). 1H NMR chemical shift values are given in ppm relative to TMS, peak assingments are based on COSY, TOCSY, NOESY and ROESY experiments. Electrospray ionization mass spectrometry (EI-MS) was carried out using a Shimadzu LC-MS QP-8000 single quadrupole benchtop mass spectrometer coupled to a QP-8000 data system. High resolution mass spectra (HR-MS) were measured on a Micromass LCT mass spectrometer, with pentaphenylalanine as reference. MS/MS-spectra were analyzed on a Micromass Quattro Ultima or a Micromass Q-TOF mass spectrometer. MALDI-TOF analysis was performed on a Kratos Axima CFR apparatus, with bradykinin(1-7) as external reference and -cyano-4-hydroxycinnamic acid as matrix. *R*f values were determined by thin layer chromatography (TLC) on Merck precoated silica gel 60F254 (0.25 mm) plates. Spots were visualized with UV quenching, ninhydrin or TDM/Cl2.[1] Column chromatography was performed on silica gel 60 (70-230 mesh). Analytical HPLC was performed on a Shimadzu HPLC system (SPD-10A VP) coupled to an evaporative light scattering detector (PL-ELS 1000, Polymer Laboratories) or a UV/VIS detector operating at 220/254 nm. Analytical HPLC runs were performed on an Alltech Adsorbosphere XL C8 column (90Å pore size, 5m particle size, 0.46 x 25 cm) at a flow of 1 mLmin-1 using a linear gradient of buffer B (100% in 25 min) from 100% buffer A (buffer A: 0.1% TFA in H2O; buffer B: 0.085% TFA in CH3CN/H2O 95:5 v/v). Preparative HPLC runs were performed on an Alltech Adsorbosphere XL C8 column (90Å pore size, 10m particle size, 2.2 x 25 cm) at a flow of 11.5 mLmin-1 using a linear gradient of buffer B (100% in 40 min) from 100% buffer A (buffer A: 0.1% TFA in H2O; buffer B: 0.085% TFA in CH3CN/H2O 95:5 v/v). Azido acids were synthesized according to the method described by Lundquist and Pelletier.[2] The hydroxysuccinimide esters were synthesized as described by Anderson et al.[3]

**Cross-metathesis reaction.** ArgoGel-OH resin was loaded with Fmoc-Alg-OH using the method of Sieber.[4] Fmoc-Alg-O-ArgoGel (0.36 mmol/g, 0.7 g, 0.25 mmol) was washed with CH2Cl2 (3  10 mL, 2 min) and DMF (3  10 mL, 2 min) The Fmoc group was removed by treatment with 20% piperidine in DMF (3  10 mL, 8 min) and the resin was subsequently washed with DMF (3  10 mL, 2 min), CH2Cl2 (3  10 mL, 2 min) and DMF (3  10 mL, 2 min). Reprotection of the free amine was performed with Boc2O (764 mg, 3.5 mmol) in DMF (10 mL) in the presence of DiPEA (1.2 mL, 4.7 mmol) for 2 h at room temperature (the deprotection/reprotection steps were monitored with the Kaiser test)[5]. The resin containing Boc-Alg-O-ArgoGel was washed with DMF (3  10 mL, 2 min), and CH2Cl2 (3  10 mL, 2 min). The obtained resin was swelled in 1,1,2-trichloroethane (20 mL), Fmoc-Alg-OH (768 mg, 2.28 mmol) was added and the reaction mixture was purged with N2 at 60oC for 20 min. Then, 2nd generation Grubbs catalyst (129 mg, 0.15 mmol) was added and the obtained reaction mixture was allowed to react overnight at 60oC under a nitrogen atmosphere. Subsequently, the resin was washed with DCM (6  10 mL, 2 min) and diethyl ether (3  10 mL, 2 min) and dried under vacuum. The yield of the cross-metathesis reaction was calculated from an Fmoc determination[6] and was found to be 56% (0.20 mmol/g).

**Synthesis of monocyclic peptide (14).** The resin loaded with the cross-metathesis product (0.7 g, 0.14 mmol) was washed with CH2Cl2 (3  10 mL, 2 min) and DMF (3  10 mL, 2 min), subsequently, the Fmoc group was removed by treatment with 20% piperidine in DMF (3  10 mL, 8 min) and the resin was washed with DMF (3  10 mL, 2 min), CH2Cl2 (3  10 mL, 2 min) and DMF (3  10 mL, 2 min). The resin was suspended in DMF (15 mL) and N3-Ala-OSu (80 mg, 0.68 mmol) was coupled to the free amine in the presence of DIPEA (215 L, 1.2 mmol). After 2 h the resin was washed with DMF (3  10 mL, 2 min) and CH2Cl2 (3  10 mL, 2 min), and the resin was suspended in TFA/CH2Cl2 (10 ml, 1:1 v/v) for 20 min to remove the Boc group. Subsequently, the resin was washed with CH2Cl2 (6  10 mL, 2 min), DIPEA/CH2Cl2 (1:9 v/v; 3  10 mL, 2 min) and CH2Cl2 (3  10 mL, 2 min). Then, Fmoc-Asn(Trt)-OSu (695 mg, 1.0 mmol) in DMF (10 mL) followed by DIPEA (215 L, 1.2 mmol) were added. After 1 h the coupling was complete according to the Kaiser test. The resin was washed with DMF (3  10 mL, 2 min), CH2Cl2 (3  10 mL, 2 min) and DMF (3  10 mL, 2 min) and the Fmoc group was removed with piperidine in DMF (1:4 v/v; 3  10 mL, 8 min). After washing with DMF (3  10 mL, 2 min), CH2Cl2 (3  10 mL, 2 min) and DMF (3  10 mL, 2 min), Fmoc-Alg-ONSu (438 mg, 1.0 mmol) was coupled for 1 h. After Fmoc removal and washing of the resin, an extra washing step with DIPEA/DMF (1:9 v/v; 3  10 mL, 2 min) was carried out to remove any residual piperidine salt. The macrocyclization was carried out with HATU (176 mg, 0.46 mmol), HOAt (63 mg, 0.46 mmol) in the presence of DIPEA (241 L, 1.4 mmol) in DMF (10 mL) in 16 h at room temperature to obtain the ring E. The resin was washed with DMF (5  10 mL, 2 min) and all remaining free amines were acetylated with acetic anhydride (47 L, 0.5 mmol) with pyridine (81 L, 1.0 mmol) as base in DMF (5 mL) for 30 min subsequently followed by extensively washing of the resin with DMF (3  10 mL, 2 min), CH2Cl2 (3  10 mL, 2 min), DMF (3  10 mL, 2 min) and dioxane (3  10 mL, 2 min). The N-terminal azide was converted into the corresponding amine by treatment with trimethylphosphine (1M in toluene; 1.51 mL, 1.5 mmol) in dioxane/H2O (4:1 v/v) for 1 h. Then, the resin was washed with dioxane (6  10 mL, 2 min), CH2Cl2 (3  10 mL, 2 min) and DMF (3  10 mL, 2 min) followed by the addition of Boc-Alg-OH (151 mg, 0.7 mmol), BOP (310 mg, 0.7 mmol) and DIPEA ( 244 L, 1.4 mmol) in DMF (10 mL). After 1 h, the resin was washed with DMF (3  10 mL, 2 min), CH2Cl2 (3  10 mL, 2 min), DMF (3  10 mL, 2 min) and MeOH (3  10 mL, 2 min). The peptide was cleaved from the resin by a catalytic amount KCN in methanol (15 mL) during 16 h. The resin was filtered and washed with methanol (3  10 mL). The filtrate was concentrated in vacuo and the residue was purified by column chromatography with CH2Cl2/MeOH as eluens (97:3 -> 90:10 v/v) followed by preparative HPLC to yield 16.1 mg (overall yield 11%, average yield per step: 82%) of pure monocyclic peptide **8**. *R*f=0.51 CH2Cl2/MeOH 9:1 v/v); *R*t=18.1 min; EI-MS (50 eV): *m/z* 920.75 [*M* + H]+, 942.90 [*M* + Na]+, 820.65 [(*M* - C5H8O2) + H]+.

**Synthesis of bicyclic peptide (7).** The monocyclic peptide **14** (7.3 mg, 7.9 mol) was dissolved in CH2Cl2 (3 mL) and refluxed in a nitrogen atmosphere during 30 min then followed by the addition of 2nd generation Grubbs catalyst (0.9 mg, 1.1 mol) and the reaction mixture was allowed to react for 4 h. The solvent was removed in vacuo and the residue was purified by column chromatography with CH2Cl2/MeOH as eluens (97:3 -> 90:10 v/v) to obtain bicyclic peptide **7** in 50% (3.6 mg) yield. *R*f=0.42 CH2Cl2/MeOH 9:1 v/v); *R*t=17.1 min; EI-MS (50 eV): *m/z* 892.80 [*M* + H]+, 915.60 [*M* + Na]+.

**Synthesis of linear peptide (1).** Peptide **1** was synthesized on an Applied Biosystems 433A peptide synthesizer using the FastMoc protocol on Fmoc-Alg-O-ArgoGel on a 0.25 mmol scale. Each synthetic cycle consisted of N-Fmoc removal by a 10 min treatment with 20% piperidine in NMP, a 6 min NMP wash, a 45 min coupling step with 1.0 mmol of preactivated Fmoc amino acid in the presence of 2 equivalents DIPEA, and a 6 min NMP wash. N-Fmoc amino acids were activated in situ with 1.0 mmol HBTU/HOBt (0.36M in NMP) in the presence of DIPEA (2.0 mmol). The peptide was detached from the resin by treatment with a catalytic amount of KCN in MeOH. After washing the resin with MeOH (3  10 mL) the filtrate was concentrated in vacuo and the residue was purified by column chromatography with CH2Cl2/MeOH as eluens (97:3 -> 90:10 v/v) to yield 187 mg (69%) of the linear peptide **1**. *R*f=0.57 CH2Cl2/MeOH 9:1 v/v); *R*t=18.9 min; EI-MS (50 eV): *m/z* 948.65 [*M* + H]+, 970.70 [*M* + Na]+.

**Molecular modeling.** Modeling of the RCM-monocyclic products (Scheme 3) was carried out using MacroModel 7.0[7] on a SiliconGraphics O2 workstation using the organic builder and the peptide builder in the grow mode. In the computations MMFF was used as the forcefield.[8] Structure minimization was performed on a SiliconGraphics Origin 200 Server and molecular mechanics calculations were performed with the following settings: MMFF (planar N's)[8], PRCG[9], CCrit 0.01 kJ/molÅ[10]. Finally, a conformational search was carried out starting with the minimized structure using a Monte Carlo procedure to locate the low-energy conformations of the structure of interest. The settings of a standard Monte Carlo Multiple Minimum (MCMM) conformational search were used, which included 1000 steps.

**References**

Abbreviations: Alg: allylglycine, Boc: *tert*-butyloxycarbonyl, BOP: benzotriazol-1-yl-oxy-tris-(dimethylamino)phosphonium hexafluorophosphate, *t*Bu: *tert*-butyl, DIPEA: *N*,*N*-diisopropylethylamine, DMF: *N*,*N*-dimethylformamide, Fmoc: *N*-9-fluorenylmethyloxycarbonyl, HATU: *N*-((dimethylamino)-1*H*-1,2,3-triazole[4,5-b]pyridin-1-yl-methylene)-*N*-methylmethanaminium hexafluorophosphate, HBTU: 2-(1*H*-benzotriazol-1-yl)-1,1,3,3-tetramethyluronium hexafluorophosphate, HOAt: 1-hydroxy-7-azabenzotriazole, HOBt: *N*-hydroxybenzotriazole, LCES-TOF: liquid chromatography electrospray time of flight, NMP: *N*-methylpyrrolidone, ONSu: hydroxysuccinimidyl, SPPS: solid phase peptide synthesis, TCE: 1,1,2-trichloroethane, TFA: trifluoroacetic acid, TIS: triisopropylsilane, Trt: trityl.

[1] E. von Arx, M. Faupel, M.J. Bruggen, *J. Chromatogr.* **1976**, *120*, 224.

[2] J.T. Lundquist, IV, J.C. Pelletier, *Org. Lett.* **2001**, *3*, 781.

[3] G.W. Anderson, J.F. Zimmerman, F.M. Callahan, *J. Am. Chem. Soc.* **1964**, *86*, 1839.

[4] P. Sieber, *Tetrahedron Lett.* **1987**, *28*, 647.

[5] E. Kaiser, R.L. Colescott, C.D. Bossinger, P.I. Cook, *Anal. Biochem.* **1970**, *34*, 595.

[6] J. Meienhofer, M. Waki, E.P. Heimer, T.J. Lambros, R.C. Makofske, C.-D. Wang, *Int. J. Peptide Protein Res.* **1979**, *13*, 35.

(7) F. Mohamadi, N.C.J. Richards, W.C. Guida, R. Liskamp, C. Caufield, G. Chang, T. Hendrickson, W.C. Still, *J. Comput. Chem.* **1990**, *11*, 440.

(8) MMFF, MMFF94 or MMFF for short: T.A. Halgren, *J. Comput Chem.* **1996**, *17*, issues 5 and 6.

(9) PRCG: Conjugate gradient minimization using the Polak-Ribiere first derivative method: E. Polak, G. Ribiere, *Revue Francaise Informat. Recherche Operationelle* **1969**, *16*, 35.

(10) Convergence criterion: the default gradient value was used.

Table 1. 1H NMR data () for monocyclic peptide **14** in CDCl3/CD3OH 14.5:1 v/v at 283 K.a

| **Residueb** | **NH** | **H-** | **H-** | **H-** | **H-** | **others** |
| --- | --- | --- | --- | --- | --- | --- |
| Alg1 | 5.42 | 4.09 | 2.46, 2.45 | 5.62 | 5.06 | 1.41 Boc |
| Ala2 | 7.44 | 4.34 | 1.28 |  |  |  |
| Alg3 | 7.62 | 5.18 | 2.50, 2.36 | 5.18 |  |  |
| Alg4 | 7.83 | 4.26 | 2.46, 2.45 | 5.62 | 5.06 |  |
| Asn(Trt)5 | 7.82 | 4.70 | 3.11, 2.46 |  |  | 7.62 CON*H*Trt  7.15-7.30 arom H Trt |
| Alg6 | 6.87 | 4.83 | 2.60, 2.09 | 5.18 |  | 3.72 OMe |

aObtained at 500 MHz, bpeak assingments are based on COSY, TOCSY, NOESY and ROESY experiments.

Table 2. 1H NMR data () for bicyclic peptide **9** in CDCl3/CD3OH 14.5:1 v/v at 283 K.a

| **Residueb** | **NH** | **H-** | **H-** | **H-** | **others** |
| --- | --- | --- | --- | --- | --- |
| Alg1 | 5.74 | 4.20 | 2.89, 2.81 | 5.38 | 1.45 Boc |
| Ala2 | 7.84 | 4.27 | 1.32 |  |  |
| Alg3 | 7.32 | 4.12 | 2.65, 2.33 | 5.29 |  |
| Alg4 | 8.10 | 4.20 | 2.65, 2.02 | 5.45 |  |
| Asn(Trt)5 | 7.90 | 4.80 | 3.18, 2.64 |  | 7.57 CON*H*Trt  7.18-7.31 arom H Trt |
| Alg6 | 6.70 | 4.80 | 2.50, 1.90 | 5.09 | 3.75 OMe |

aObtained at 500 MHz, bpeak assingments are based on COSY, TOCSY, NOESY and ROESY experiments.

Table 3. 1H NMR data () for linear peptide **2** in CDCl3/CD3OH 14.5:1 v/v at 283 K.a

| **Residueb** | **NH** | **H-** | **H-** | **H-** | **H-** | **others** |
| --- | --- | --- | --- | --- | --- | --- |
| Alg1 | 5.50 | 4.06 | 2.48, 2.31 | 5.67 | 5.07 | 1.44 Boc |
| Ala2 | 7.55 | 4.22 | 1.28 |  |  |  |
| Alg3 | 7.43 | 4.21 | 2.56, 2.43 | 5.67 | 5.07 |  |
| Alg4 | 7.34 | 4.35 | 2.53, 2.31 | 5.67 | 5.07 |  |
| Asn(Trt)5 | 7.69 | 4.74 | 2.88, 2.78 |  |  | 7.90 CON*H*Trt  7.19-7.27 arom H Trt |
| Alg6 | 7.55 | 4.47 | 2.46, 2.42 | 5.67 | 5.07 | 3.70 OMe |

aObtained at 500 MHz, bpeak assingments are based on COSY, TOCSY, NOESY and ROESY experiments.
